# Supplementary material for: CapsNet-SSP: multilane capsule network for predicting human saliva-secretory proteins
Source: BMC Bioinformatics. 2020 Jun 9;21:237. doi: 10.1186/s12859-020-03579-2 (PMC7285745; doi:10.1186/s12859-020-03579-2)
Supplement: Supplementary file 1 — Additional file 1. Thirty-Seven human saliva-secretory proteins that do not overlap with training set. These proteins are collected using the LC-MS/MS analyses reported in the literature and databases of SPD, LOCATE and UniProt. Then, the proteins in the training set are removed. [file 12859_2020_3579_MOESM1_ESM.xls]

## Sheet: Sheet1
Uniprot ID
P01023
P43652
P02768
P12429
P02647
P02749
P25311
P27797
P16870
P54108
P01037
P09228
P01036
P28325
P07339
Q96BQ1
P09211
P19827
P06870
Q9UBX7
Q9UKR3
Q92876
P22079
P02788
P61626
P80303
P07237
P30101
P12273
P62937
P24158
P06702
P29508
P02787
P01033
O60235
P04004
