# Supplementary material for: CapsNet-SSP: multilane capsule network for predicting human saliva-secretory proteins
Source: BMC Bioinformatics. 2020 Jun 9;21:237. doi: 10.1186/s12859-020-03579-2 (PMC7285745; doi:10.1186/s12859-020-03579-2)
Supplement: Supplementary file 2 — Additional file 2. Function enrichment analysis of top 4000 proteins. The function enrichment analysis is implemented by treating the entire set of human proteins as the background among the top 4000 proteins ranked by S-value, using DAVID against the GO and KEGG pathway. [file 12859_2020_3579_MOESM2_ESM.xls]

## Sheet: GO_BP
Category	Term	Count	%	P-Value	Benjamini
GOTERM_BP_DIRECT	homophilic cell adhesion via plasma membrane adhesion molecules	126	6.6	7.2e-97	2.8e-93
GOTERM_BP_DIRECT	proteolysis	224	11.8	2.4e-96	4.5e-93
GOTERM_BP_DIRECT	cell adhesion	210	11	3e-92	3.9e-89
GOTERM_BP_DIRECT	complement activation	76	4	8.1e-64	7.8e-61
GOTERM_BP_DIRECT	extracellular matrix organization	113	5.9	1.5e-62	1.1e-59
GOTERM_BP_DIRECT	complement activation, classical pathway	79	4.2	2.4e-60	1.6e-57
GOTERM_BP_DIRECT	receptor-mediated endocytosis	105	5.5	7.4e-57	4.1e-54
GOTERM_BP_DIRECT	negative regulation of endopeptidase activity	83	4.4	1.6e-54	7.7e-52
GOTERM_BP_DIRECT	immune response	149	7.8	1.2e-47	5.2e-45
GOTERM_BP_DIRECT	regulation of immune response	93	4.9	1.9e-46	7.2e-44
GOTERM_BP_DIRECT	collagen catabolic process	46	2.4	1.6e-31	5.4e-29
GOTERM_BP_DIRECT	extracellular matrix disassembly	50	2.6	1.8e-31	5.8e-29
GOTERM_BP_DIRECT	defense response to bacterium	64	3.4	9.9e-27	2.9e-24
GOTERM_BP_DIRECT	Fc-gamma receptor signaling pathway involved in phagocytosis	58	3	3.5e-25	9.5e-23
GOTERM_BP_DIRECT	innate immune response	109	5.7	2.4e-21	6.1e-19
GOTERM_BP_DIRECT	platelet degranulation	46	2.4	1.3e-19	3.2e-17
GOTERM_BP_DIRECT	cell-matrix adhesion	42	2.2	8.4e-19	1.9e-16
GOTERM_BP_DIRECT	chemokine-mediated signaling pathway	37	1.9	1.3e-18	2.9e-16
GOTERM_BP_DIRECT	monocyte chemotaxis	28	1.5	7e-18	1.4e-15
GOTERM_BP_DIRECT	neutrophil chemotaxis	34	1.8	6.3e-17	2.1e-14
GOTERM_BP_DIRECT	inflammatory response	90	4.7	1e-15	1.8e-13
GOTERM_BP_DIRECT	lymphocyte chemotaxis	21	1.1	6.4e-15	1.1e-12
GOTERM_BP_DIRECT	cellular response to interleukin-1	33	1.7	9e-15	1.5e-12
GOTERM_BP_DIRECT	Fc-epsilon receptor signaling pathway	53	2.8	1.3e-13	2e-11
GOTERM_BP_DIRECT	chemotaxis	42	2.2	3e-13	4.7e-11
GOTERM_BP_DIRECT	cell chemotaxis	29	1.5	1.7e-12	2.5e-10
GOTERM_BP_DIRECT	phagocytosis, recognition	19	1	2.5e-12	3.5e-10
GOTERM_BP_DIRECT	phagocytosis, engulfment	21	1.1	3.5e-12	4.7e-10
GOTERM_BP_DIRECT	heterophilic cell-cell adhesion via plasma membrane cell adhesion molecules	25	1.3	3.7e-12	4.9e-10
GOTERM_BP_DIRECT	skeletal system development	43	2.3	5e-12	6.4e-10
GOTERM_BP_DIRECT	positive regulation of B cell activation	18	0.9	6.8e-12	8.4e-10
GOTERM_BP_DIRECT	positive regulation of inflammatory response	30	1.6	7.9e-12	9.5e-10
GOTERM_BP_DIRECT	positive regulation of ERK1 and ERK2 cascade	49	2.6	1.4e-11	1.6e-09
GOTERM_BP_DIRECT	adherens junction organization	21	1.1	1.4e-11	1.6e-09
GOTERM_BP_DIRECT	cellular response to interferon-gamma	26	1.4	1.6e-11	1.8e-09
GOTERM_BP_DIRECT	fibrinolysis	16	0.8	1.7e-11	1.8e-09
GOTERM_BP_DIRECT	cellular response to tumor necrosis factor	37	1.9	2e-11	2.1e-09
GOTERM_BP_DIRECT	calcium-dependent cell-cell adhesion via plasma membrane cell adhesion molecules	18	0.9	3.9e-11	3.9e-09
GOTERM_BP_DIRECT	cell-cell signaling	61	3.2	3.9e-11	3.8e-09
GOTERM_BP_DIRECT	acute-phase response	21	1.1	5e-11	4.8e-09
GOTERM_BP_DIRECT	collagen fibril organization	21	1.1	5e-11	4.8e-09
GOTERM_BP_DIRECT	negative regulation of cysteine-type endopeptidase activity	13	0.7	7.9e-10	7.4e-08
GOTERM_BP_DIRECT	antibacterial humoral response	21	1.1	8e-10	7.3e-08
GOTERM_BP_DIRECT	digestion	25	1.3	1.4e-09	1.2e-07
GOTERM_BP_DIRECT	chondroitin sulfate catabolic process	12	0.6	1.8e-09	1.6e-07
GOTERM_BP_DIRECT	regulation of complement activation	17	0.9	2.1e-09	1.8e-07
GOTERM_BP_DIRECT	defense response to Gram-negative bacterium	23	1.2	2.3e-09	1.9e-07
GOTERM_BP_DIRECT	single organismal cell-cell adhesion	32	1.7	2.9e-09	2.4e-07
GOTERM_BP_DIRECT	endodermal cell differentiation	16	0.8	3.1e-09	2.5e-07
GOTERM_BP_DIRECT	cellular protein metabolic process	35	1.8	3.2e-09	2.5e-07
GOTERM_BP_DIRECT	negative regulation of angiogenesis	24	1.3	5.5e-09	4.3e-07
GOTERM_BP_DIRECT	leukocyte migration	35	1.8	8.3e-09	6.2e-07
GOTERM_BP_DIRECT	positive regulation of cell migration	45	2.4	1e-08	7.7e-07
GOTERM_BP_DIRECT	cell recognition	14	0.7	1.3e-08	9.4e-07
GOTERM_BP_DIRECT	defense response to Gram-positive bacterium	28	1.5	1.3e-08	9.5e-07
GOTERM_BP_DIRECT	antigen processing and presentation	22	1.2	1.4e-08	9.8e-07
GOTERM_BP_DIRECT	small GTPase mediated signal transduction	54	2.8	1.7e-08	1.1e-06
GOTERM_BP_DIRECT	angiogenesis	50	2.6	2.9e-08	2e-06
GOTERM_BP_DIRECT	B cell receptor signaling pathway	21	1.1	5.6e-08	3.7e-06
GOTERM_BP_DIRECT	lipid catabolic process	27	1.4	5.9e-08	3.8e-06
GOTERM_BP_DIRECT	O-glycan processing	22	1.2	8.3e-08	5.3e-06
GOTERM_BP_DIRECT	synapse assembly	22	1.2	1.1e-07	7.2e-06
GOTERM_BP_DIRECT	negative regulation of serine-type endopeptidase activity	10	0.5	1.2e-07	7.4e-06
GOTERM_BP_DIRECT	hyaluronan catabolic process	11	0.6	1.3e-07	7.9e-06
GOTERM_BP_DIRECT	negative chemotaxis	16	0.8	1.7e-07	1e-05
GOTERM_BP_DIRECT	glycosaminoglycan catabolic process	14	0.7	1.9e-07	1.1e-05
GOTERM_BP_DIRECT	negative regulation of fibrinolysis	9	0.5	2.8e-07	1.6e-05
GOTERM_BP_DIRECT	axon guidance	38	2	3.2e-07	1.8e-05
GOTERM_BP_DIRECT	defense response to fungus	14	0.7	3.3e-07	1.9e-05
GOTERM_BP_DIRECT	retina homeostasis	17	0.9	3.5e-07	1.9e-05
GOTERM_BP_DIRECT	glycosphingolipid metabolic process	18	0.9	4e-07	2.2e-05
GOTERM_BP_DIRECT	integrin-mediated signaling pathway	28	1.5	4.5e-07	2.4e-05
GOTERM_BP_DIRECT	female pregnancy	26	1.4	6.5e-07	3.4e-05
GOTERM_BP_DIRECT	central nervous system development	31	1.6	8.1e-07	4.3e-05
GOTERM_BP_DIRECT	killing of cells of other organism	10	0.5	9.1e-07	4.7e-05
GOTERM_BP_DIRECT	cytolysis	12	0.6	9.3e-07	4.7e-05
GOTERM_BP_DIRECT	cell wall macromolecule catabolic process	9	0.5	9.4e-07	4.7e-05
GOTERM_BP_DIRECT	positive regulation of cell-substrate adhesion	16	0.8	1e-06	5e-05
GOTERM_BP_DIRECT	viral entry into host cell	24	1.3	1.1e-06	5.7e-05
GOTERM_BP_DIRECT	positive regulation of peptidyl-tyrosine phosphorylation	24	1.3	1.8e-06	9e-05
GOTERM_BP_DIRECT	negative regulation of blood coagulation	9	0.5	2.6e-06	0.00012
GOTERM_BP_DIRECT	semaphorin-plexin signaling pathway	14	0.7	5.4e-06	0.00026
GOTERM_BP_DIRECT	proteolysis involved in cellular protein catabolic process	17	0.9	5.9e-06	0.00028
GOTERM_BP_DIRECT	complement activation, alternative pathway	9	0.5	6.1e-06	0.00028
GOTERM_BP_DIRECT	nervous system development	53	2.8	6.2e-06	0.00028
GOTERM_BP_DIRECT	carbohydrate metabolic process	37	1.9	8.4e-06	0.00038
GOTERM_BP_DIRECT	response to reactive oxygen species	15	0.8	8.5e-06	0.00038
GOTERM_BP_DIRECT	axonogenesis	25	1.3	1.5e-05	0.00064
GOTERM_BP_DIRECT	heterotypic cell-cell adhesion	11	0.6	1.5e-05	0.00065
GOTERM_BP_DIRECT	blood coagulation, intrinsic pathway	10	0.5	1.5e-05	0.00066
GOTERM_BP_DIRECT	regulation of cell migration	21	1.1	1.6e-05	0.00067
GOTERM_BP_DIRECT	peptidyl-glutamic acid carboxylation	8	0.4	1.8e-05	0.00076
GOTERM_BP_DIRECT	T cell mediated cytotoxicity	7	0.4	1.9e-05	0.00079
GOTERM_BP_DIRECT	regulation of acrosome reaction	7	0.4	1.9e-05	0.00079
GOTERM_BP_DIRECT	response to endoplasmic reticulum stress	21	1.1	1.9e-05	0.0008
GOTERM_BP_DIRECT	negative regulation of cell adhesion	14	0.7	2.3e-05	0.00095
GOTERM_BP_DIRECT	cell adhesion mediated by integrin	9	0.5	2.6e-05	0.001
GOTERM_BP_DIRECT	lipoprotein metabolic process	14	0.7	3.2e-05	0.0013
GOTERM_BP_DIRECT	keratan sulfate catabolic process	8	0.4	3.9e-05	0.0016
GOTERM_BP_DIRECT	semaphorin-plexin signaling pathway involved in axon guidance	8	0.4	3.9e-05	0.0016
GOTERM_BP_DIRECT	Roundabout signaling pathway	8	0.4	3.9e-05	0.0016
GOTERM_BP_DIRECT	retinoid metabolic process	18	0.9	4.4e-05	0.0017
GOTERM_BP_DIRECT	protein folding	36	1.9	4.4e-05	0.0017
GOTERM_BP_DIRECT	positive chemotaxis	13	0.7	6.3e-05	0.0024
GOTERM_BP_DIRECT	protein folding in endoplasmic reticulum	8	0.4	7.8e-05	0.003
GOTERM_BP_DIRECT	protein catabolic process	14	0.7	8e-05	0.003
GOTERM_BP_DIRECT	negative regulation of peptidase activity	9	0.5	8.1e-05	0.003
GOTERM_BP_DIRECT	positive regulation of pathway-restricted SMAD protein phosphorylation	15	0.8	0.00012	0.0044
GOTERM_BP_DIRECT	opsonization	7	0.4	0.00012	0.0044
GOTERM_BP_DIRECT	positive regulation of vascular endothelial growth factor production	11	0.6	0.00012	0.0045
GOTERM_BP_DIRECT	phospholipid metabolic process	16	0.8	0.00013	0.0045
GOTERM_BP_DIRECT	axonal fasciculation	9	0.5	0.00013	0.0047
GOTERM_BP_DIRECT	negative regulation of endothelial cell migration	9	0.5	0.00013	0.0047
GOTERM_BP_DIRECT	positive regulation of blood coagulation	8	0.4	0.00014	0.005
GOTERM_BP_DIRECT	ossification involved in bone maturation	6	0.3	0.00015	0.0052
GOTERM_BP_DIRECT	positive regulation of natural killer cell chemotaxis	6	0.3	0.00015	0.0052
GOTERM_BP_DIRECT	chitin catabolic process	6	0.3	0.00015	0.0052
GOTERM_BP_DIRECT	complement activation, lectin pathway	6	0.3	0.00015	0.0052
GOTERM_BP_DIRECT	positive regulation of natural killer cell mediated cytotoxicity directed against tumor cell target	6	0.3	0.00015	0.0052
GOTERM_BP_DIRECT	blood coagulation	35	1.8	0.00016	0.0055
GOTERM_BP_DIRECT	negative regulation of endothelial cell apoptotic process	11	0.6	0.00018	0.006
GOTERM_BP_DIRECT	positive regulation of endothelial cell proliferation	18	0.9	0.00023	0.0078
GOTERM_BP_DIRECT	cell activation	7	0.4	0.00024	0.0081
GOTERM_BP_DIRECT	leukocyte migration involved in inflammatory response	7	0.4	0.00024	0.0081
GOTERM_BP_DIRECT	oligosaccharide metabolic process	10	0.5	0.00035	0.012
GOTERM_BP_DIRECT	positive regulation of phosphatidylinositol 3-kinase signaling	17	0.9	0.00035	0.012
GOTERM_BP_DIRECT	protein processing	18	0.9	0.0004	0.013
GOTERM_BP_DIRECT	negative regulation of plasminogen activation	5	0.3	0.0004	0.013
GOTERM_BP_DIRECT	hyaluronan metabolic process	7	0.4	0.00044	0.014
GOTERM_BP_DIRECT	axon extension involved in axon guidance	7	0.4	0.00044	0.014
GOTERM_BP_DIRECT	maintenance of gastrointestinal epithelium	7	0.4	0.00044	0.014
GOTERM_BP_DIRECT	positive regulation of exocytosis	9	0.5	0.00048	0.015
GOTERM_BP_DIRECT	cobalamin metabolic process	9	0.5	0.00048	0.015
GOTERM_BP_DIRECT	negative regulation of proteolysis	9	0.5	0.00048	0.015
GOTERM_BP_DIRECT	triglyceride homeostasis	10	0.5	0.00049	0.015
GOTERM_BP_DIRECT	wound healing	19	1	0.00051	0.016
GOTERM_BP_DIRECT	ossification	19	1	0.00051	0.016
GOTERM_BP_DIRECT	positive regulation of angiogenesis	24	1.3	0.00056	0.017
GOTERM_BP_DIRECT	regulation of cell adhesion	13	0.7	0.00056	0.017
GOTERM_BP_DIRECT	protein secretion	11	0.6	0.0006	0.018
GOTERM_BP_DIRECT	positive regulation of neutrophil chemotaxis	9	0.5	0.00069	0.021
GOTERM_BP_DIRECT	eosinophil chemotaxis	6	0.3	0.00075	0.022
GOTERM_BP_DIRECT	branchiomotor neuron axon guidance	6	0.3	0.00075	0.022
GOTERM_BP_DIRECT	glomerular filtration	6	0.3	0.00075	0.022
GOTERM_BP_DIRECT	lipid digestion	7	0.4	0.00076	0.022
GOTERM_BP_DIRECT	lipid transport	18	0.9	0.00077	0.023
GOTERM_BP_DIRECT	cellular oxidant detoxification	17	0.9	0.00085	0.025
GOTERM_BP_DIRECT	cell redox homeostasis	18	0.9	0.0009	0.026
GOTERM_BP_DIRECT	ganglioside biosynthetic process	8	0.4	0.00094	0.027
GOTERM_BP_DIRECT	positive regulation of leukocyte chemotaxis	8	0.4	0.00094	0.027
GOTERM_BP_DIRECT	positive regulation of collagen biosynthetic process	9	0.5	0.00096	0.027
GOTERM_BP_DIRECT	negative regulation of myoblast differentiation	9	0.5	0.00096	0.027
GOTERM_BP_DIRECT	phagosome maturation	5	0.3	0.0011	0.031
GOTERM_BP_DIRECT	negative regulation of receptor activity	5	0.3	0.0011	0.031
GOTERM_BP_DIRECT	positive regulation of respiratory burst	5	0.3	0.0011	0.031
GOTERM_BP_DIRECT	peptide cross-linking via chondroitin 4-sulfate glycosaminoglycan	5	0.3	0.0011	0.031
GOTERM_BP_DIRECT	glycosaminoglycan metabolic process	10	0.5	0.0012	0.033
GOTERM_BP_DIRECT	protein heterotrimerization	7	0.4	0.0012	0.034
GOTERM_BP_DIRECT	negative regulation of inflammatory response	18	0.9	0.0012	0.034
GOTERM_BP_DIRECT	cellular calcium ion homeostasis	20	1.1	0.0013	0.034
GOTERM_BP_DIRECT	triglyceride metabolic process	11	0.6	0.0013	0.036
GOTERM_BP_DIRECT	binding of sperm to zona pellucida	11	0.6	0.0013	0.036
GOTERM_BP_DIRECT	arachidonic acid secretion	9	0.5	0.0013	0.036
GOTERM_BP_DIRECT	inner ear development	12	0.6	0.0014	0.036
GOTERM_BP_DIRECT	cholesterol metabolic process	16	0.8	0.0018	0.047
GOTERM_BP_DIRECT	signal peptide processing	9	0.5	0.0018	0.047
GOTERM_BP_DIRECT	sprouting angiogenesis	9	0.5	0.0018	0.047
GOTERM_BP_DIRECT	high-density lipoprotein particle remodeling	7	0.4	0.0019	0.048

## Sheet: GO_CC
Category	Term	Count	%	P-Value	Benjamini
GOTERM_CC_DIRECT	extracellular region	745	39.2	0	0
GOTERM_CC_DIRECT	extracellular space	569	29.9	8e-248	2.3e-245
GOTERM_CC_DIRECT	extracellular exosome	627	33	1.8e-110	3.6e-108
GOTERM_CC_DIRECT	proteinaceous extracellular matrix	147	7.7	6.8e-78	1e-75
GOTERM_CC_DIRECT	extracellular matrix	136	7.2	1.4e-59	1.7e-57
GOTERM_CC_DIRECT	blood microparticle	93	4.9	9.1e-55	8.8e-53
GOTERM_CC_DIRECT	collagen trimer	70	3.7	4.8e-51	4e-49
GOTERM_CC_DIRECT	endoplasmic reticulum lumen	101	5.3	5e-51	3.6e-49
GOTERM_CC_DIRECT	anchored component of membrane	64	3.4	7.1e-35	4.6e-33
GOTERM_CC_DIRECT	cell surface	150	7.9	5.5e-34	3.2e-32
GOTERM_CC_DIRECT	lysosomal lumen	53	2.8	8.8e-32	4.7e-30
GOTERM_CC_DIRECT	basement membrane	49	2.6	3e-29	1.5e-27
GOTERM_CC_DIRECT	Golgi lumen	48	2.5	4e-23	1.8e-21
GOTERM_CC_DIRECT	lysosome	72	3.8	2.7e-20	1.1e-18
GOTERM_CC_DIRECT	plasma membrane	551	29	5.7e-20	2.2e-18
GOTERM_CC_DIRECT	external side of plasma membrane	66	3.5	5.5e-18	2e-16
GOTERM_CC_DIRECT	platelet alpha granule lumen	31	1.6	5.8e-17	3.8e-15
GOTERM_CC_DIRECT	melanosome	36	1.9	5e-12	1.6e-10
GOTERM_CC_DIRECT	immunoglobulin complex, circulating	15	0.8	3.9e-11	1.2e-09
GOTERM_CC_DIRECT	integrin complex	17	0.9	2.2e-10	6.5e-09
GOTERM_CC_DIRECT	secretory granule	27	1.4	1.9e-09	5.4e-08
GOTERM_CC_DIRECT	cell	30	1.6	3.4e-08	9e-07
GOTERM_CC_DIRECT	fibrinogen complex	9	0.5	5.8e-08	1.5e-06
GOTERM_CC_DIRECT	phagocytic vesicle	17	0.9	2.1e-07	5.1e-06
GOTERM_CC_DIRECT	phagocytic vesicle membrane	20	1.1	1.3e-06	3.1e-05
GOTERM_CC_DIRECT	high-density lipoprotein particle	12	0.6	1.6e-06	3.6e-05
GOTERM_CC_DIRECT	extracellular vesicle	18	0.9	2e-06	4.4e-05
GOTERM_CC_DIRECT	receptor complex	31	1.6	2.5e-06	5.3e-05
GOTERM_CC_DIRECT	platelet alpha granule	9	0.5	1.2e-05	0.00025
GOTERM_CC_DIRECT	endoplasmic reticulum chaperone complex	8	0.4	1.7e-05	0.00033
GOTERM_CC_DIRECT	extrinsic component of external side of plasma membrane	7	0.4	1.8e-05	0.00034
GOTERM_CC_DIRECT	transport vesicle	24	1.3	2.4e-05	0.00044
GOTERM_CC_DIRECT	basal lamina	9	0.5	2.4e-05	0.00043
GOTERM_CC_DIRECT	anchored component of plasma membrane	12	0.6	2.8e-05	0.00048
GOTERM_CC_DIRECT	secretory granule lumen	8	0.4	3.8e-05	0.00063
GOTERM_CC_DIRECT	very-low-density lipoprotein particle	10	0.5	4.2e-05	0.00069
GOTERM_CC_DIRECT	endoplasmic reticulum	115	6	4.4e-05	0.0007
GOTERM_CC_DIRECT	endocytic vesicle lumen	9	0.5	4.5e-05	0.00069
GOTERM_CC_DIRECT	platelet dense granule lumen	8	0.4	0.00014	0.0021
GOTERM_CC_DIRECT	chylomicron	8	0.4	0.00014	0.0021
GOTERM_CC_DIRECT	spherical high-density lipoprotein particle	6	0.3	0.00035	0.0051
GOTERM_CC_DIRECT	focal adhesion	58	3	0.0009	0.013
GOTERM_CC_DIRECT	semaphorin receptor complex	6	0.3	0.0023	0.031
GOTERM_CC_DIRECT	MHC class I protein complex	6	0.3	0.0023	0.031
GOTERM_CC_DIRECT	multivesicular body lumen	5	0.3	0.0023	0.031
GOTERM_CC_DIRECT	rough endoplasmic reticulum	13	0.7	0.0027	0.035
GOTERM_CC_DIRECT	endolysosome lumen	4	0.2	0.0033	0.042
GOTERM_CC_DIRECT	anchored component of external side of plasma membrane	8	0.4	0.0034	0.043
GOTERM_CC_DIRECT	sarcoplasmic reticulum	10	0.5	0.0038	0.047

## Sheet: GO_MF
Category	Term	Count	%	P-Value	Benjamini
GOTERM_MF_DIRECT	serine-type endopeptidase activity	183	9.6	5.5e-132	4.4e-129
GOTERM_MF_DIRECT	calcium ion binding	289	15.2	4.5e-118	1.8e-115
GOTERM_MF_DIRECT	serine-type endopeptidase inhibitor activity	77	4	2.6e-60	6.9e-58
GOTERM_MF_DIRECT	antigen binding	72	3.8	8.2e-50	1.6e-47
GOTERM_MF_DIRECT	extracellular matrix structural constituent	52	2.7	1.1e-39	1.8e-37
GOTERM_MF_DIRECT	heparin binding	79	4.2	6.6e-39	8.7e-37
GOTERM_MF_DIRECT	chemokine activity	40	2.1	5.9e-32	6.7e-30
GOTERM_MF_DIRECT	carbohydrate binding	70	3.7	3.8e-24	3.8e-22
GOTERM_MF_DIRECT	collagen binding	37	1.9	9.8e-23	8.7e-21
GOTERM_MF_DIRECT	serine-type peptidase activity	37	1.9	1e-21	8e-20
GOTERM_MF_DIRECT	protease binding	45	2.4	4.4e-20	3.2e-18
GOTERM_MF_DIRECT	integrin binding	42	2.2	9.4e-17	7.3e-15
GOTERM_MF_DIRECT	receptor binding	84	4.4	3.6e-16	2e-14
GOTERM_MF_DIRECT	endopeptidase inhibitor activity	24	1.3	2e-14	1.2e-12
GOTERM_MF_DIRECT	cysteine-type endopeptidase inhibitor activity	22	1.2	3.8e-14	2e-12
GOTERM_MF_DIRECT	cell adhesion molecule binding	29	1.5	1e-13	5e-12
GOTERM_MF_DIRECT	CCR chemokine receptor binding	18	0.9	1.2e-13	5.4e-12
GOTERM_MF_DIRECT	immunoglobulin receptor binding	19	1	1.4e-13	6e-12
GOTERM_MF_DIRECT	myosin V binding	15	0.8	1.4e-12	5.8e-11
GOTERM_MF_DIRECT	receptor activity	53	2.8	6e-11	2.4e-09
GOTERM_MF_DIRECT	protein disulfide isomerase activity	15	0.8	4.2e-10	1.6e-08
GOTERM_MF_DIRECT	peptidase activity	30	1.6	7.4e-10	2.7e-08
GOTERM_MF_DIRECT	metalloendopeptidase activity	34	1.8	9.1e-10	3.2e-08
GOTERM_MF_DIRECT	GDP binding	22	1.2	3.5e-09	1.2e-07
GOTERM_MF_DIRECT	virus receptor activity	25	1.3	5.3e-09	1.7e-07
GOTERM_MF_DIRECT	glycoprotein binding	24	1.3	5.5e-09	1.7e-07
GOTERM_MF_DIRECT	extracellular matrix binding	15	0.8	8.9e-09	2.6e-07
GOTERM_MF_DIRECT	hyaluronic acid binding	14	0.7	1.4e-08	3.9e-07
GOTERM_MF_DIRECT	proteoglycan binding	10	0.5	2e-08	5.5e-07
GOTERM_MF_DIRECT	growth factor activity	39	2.1	4.1e-08	1.1e-06
GOTERM_MF_DIRECT	copper ion binding	21	1.1	4.5e-08	1.2e-06
GOTERM_MF_DIRECT	lysozyme activity	10	0.5	7.3e-08	1.8e-06
GOTERM_MF_DIRECT	sulfuric ester hydrolase activity	11	0.6	7.6e-08	1.8e-06
GOTERM_MF_DIRECT	scavenger receptor activity	19	1	8.9e-08	2.1e-06
GOTERM_MF_DIRECT	metalloendopeptidase inhibitor activity	11	0.6	1.9e-07	4.2e-06
GOTERM_MF_DIRECT	hydrolase activity, hydrolyzing O-glycosyl compounds	14	0.7	7.9e-07	1.7e-05
GOTERM_MF_DIRECT	glycosaminoglycan binding	11	0.6	8.6e-07	1.9e-05
GOTERM_MF_DIRECT	low-density lipoprotein particle binding	10	0.5	1.3e-06	2.7e-05
GOTERM_MF_DIRECT	complement component C1q binding	8	0.4	1.6e-06	3.2e-05
GOTERM_MF_DIRECT	arylsulfatase activity	9	0.5	1.7e-06	3.3e-05
GOTERM_MF_DIRECT	ribonuclease activity	12	0.6	1.7e-06	3.3e-05
GOTERM_MF_DIRECT	small molecule binding	7	0.4	3.7e-06	7e-05
GOTERM_MF_DIRECT	laminin binding	12	0.6	4.7e-06	8.7e-05
GOTERM_MF_DIRECT	fibronectin binding	12	0.6	7.5e-06	0.00014
GOTERM_MF_DIRECT	endonuclease activity	17	0.9	9.3e-06	0.00016
GOTERM_MF_DIRECT	heparan sulfate proteoglycan binding	10	0.5	9.8e-06	0.00017
GOTERM_MF_DIRECT	insulin-like growth factor II binding	7	0.4	1.4e-05	0.00023
GOTERM_MF_DIRECT	peptidase inhibitor activity	9	0.5	3.1e-05	0.00052
GOTERM_MF_DIRECT	extracellular matrix structural constituent conferring tensile strength	6	0.3	3.5e-05	0.00057
GOTERM_MF_DIRECT	low-density lipoprotein receptor activity	8	0.4	5.5e-05	0.00087
GOTERM_MF_DIRECT	chemoattractant activity	11	0.6	7.7e-05	0.0012
GOTERM_MF_DIRECT	chitinase activity	6	0.3	0.00011	0.0017
GOTERM_MF_DIRECT	IgG binding	7	0.4	0.00018	0.0026
GOTERM_MF_DIRECT	polypeptide N-acetylgalactosaminyltransferase activity	9	0.5	0.00022	0.0032
GOTERM_MF_DIRECT	lipid transporter activity	9	0.5	0.00022	0.0032
GOTERM_MF_DIRECT	mannose binding	9	0.5	0.00022	0.0032
GOTERM_MF_DIRECT	transforming growth factor beta receptor binding	13	0.7	0.00026	0.0038
GOTERM_MF_DIRECT	cytokine activity	32	1.7	0.00028	0.0039
GOTERM_MF_DIRECT	sialic acid binding	6	0.3	0.00028	0.0039
GOTERM_MF_DIRECT	chitin binding	6	0.3	0.00028	0.0039
GOTERM_MF_DIRECT	CXCR3 chemokine receptor binding	5	0.3	0.00032	0.0044
GOTERM_MF_DIRECT	collagen binding involved in cell-matrix adhesion	5	0.3	0.00032	0.0044
GOTERM_MF_DIRECT	peptidoglycan binding	7	0.4	0.00033	0.0044
GOTERM_MF_DIRECT	insulin-like growth factor I binding	7	0.4	0.00033	0.0044
GOTERM_MF_DIRECT	GTPase activity	39	2.1	0.00034	0.0045
GOTERM_MF_DIRECT	chemorepellent activity	10	0.5	0.00044	0.0057
GOTERM_MF_DIRECT	transmembrane receptor protein tyrosine phosphatase activity	8	0.4	0.00045	0.0057
GOTERM_MF_DIRECT	GTP binding	56	2.9	0.00053	0.0067
GOTERM_MF_DIRECT	CXCR chemokine receptor binding	6	0.3	0.00058	0.0072
GOTERM_MF_DIRECT	semaphorin receptor binding	9	0.5	0.00066	0.0081
GOTERM_MF_DIRECT	Notch binding	8	0.4	0.00067	0.0081
GOTERM_MF_DIRECT	insulin-like growth factor binding	8	0.4	0.00067	0.0081
GOTERM_MF_DIRECT	alkaline phosphatase activity	5	0.3	0.00089	0.011
GOTERM_MF_DIRECT	lipase inhibitor activity	5	0.3	0.00089	0.011
GOTERM_MF_DIRECT	serine-type carboxypeptidase activity	7	0.4	0.0009	0.011
GOTERM_MF_DIRECT	apolipoprotein binding	7	0.4	0.0009	0.011
GOTERM_MF_DIRECT	sialyltransferase activity	8	0.4	0.00098	0.011
GOTERM_MF_DIRECT	phospholipase A2 activity	10	0.5	0.0014	0.015
GOTERM_MF_DIRECT	neuropilin binding	7	0.4	0.0014	0.015
GOTERM_MF_DIRECT	RAGE receptor binding	6	0.3	0.0018	0.02
GOTERM_MF_DIRECT	calcium-dependent protein binding	14	0.7	0.0018	0.02
GOTERM_MF_DIRECT	glutathione peroxidase activity	8	0.4	0.0019	0.02
GOTERM_MF_DIRECT	CCR1 chemokine receptor binding	5	0.3	0.0019	0.02
GOTERM_MF_DIRECT	phospholipase activator activity	5	0.3	0.0019	0.02
GOTERM_MF_DIRECT	transforming growth factor beta binding	7	0.4	0.0021	0.021
GOTERM_MF_DIRECT	peroxidase activity	8	0.4	0.0026	0.027
GOTERM_MF_DIRECT	ribonuclease A activity	4	0.2	0.0028	0.028
GOTERM_MF_DIRECT	procollagen-proline 4-dioxygenase activity	4	0.2	0.0028	0.028
GOTERM_MF_DIRECT	semaphorin receptor activity	6	0.3	0.0029	0.029
GOTERM_MF_DIRECT	gamma-catenin binding	6	0.3	0.0029	0.029
GOTERM_MF_DIRECT	cysteine-type endopeptidase activity	14	0.7	0.003	0.029
GOTERM_MF_DIRECT	fibroblast growth factor binding	8	0.4	0.0034	0.033
GOTERM_MF_DIRECT	complement binding	5	0.3	0.0036	0.034

## Sheet: KEGG
Category	Term	Count	%	P-Value	Benjamini
KEGG_PATHWAY	ECM-receptor interaction	56	2.9	2.7e-35	6.3e-33
KEGG_PATHWAY	Complement and coagulation cascades	50	2.6	3.1e-35	3.6e-33
KEGG_PATHWAY	Protein digestion and absorption	43	2.3	1.2e-20	6.9e-19
KEGG_PATHWAY	Cell adhesion molecules (CAMs)	55	2.9	1.7e-20	7.7e-19
KEGG_PATHWAY	Lysosome	47	2.5	1.3e-17	4.9e-16
KEGG_PATHWAY	Focal adhesion	63	3.3	1.8e-17	6e-16
KEGG_PATHWAY	PI3K-Akt signaling pathway	82	4.3	2.8e-15	8.1e-14
KEGG_PATHWAY	Staphylococcus aureus infection	28	1.5	2.6e-14	6.8e-13
KEGG_PATHWAY	Pancreatic secretion	32	1.7	1.6e-10	3.8e-09
KEGG_PATHWAY	Cytokine-cytokine receptor interaction	56	2.9	4.9e-10	1e-08
KEGG_PATHWAY	Chemokine signaling pathway	47	2.5	6.5e-10	1.3e-08
KEGG_PATHWAY	Phagosome	40	2.1	2.9e-09	5.3e-08
KEGG_PATHWAY	Glycosaminoglycan degradation	13	0.7	1.4e-08	2.3e-07
KEGG_PATHWAY	Axon guidance	34	1.8	5e-08	7.9e-07
KEGG_PATHWAY	Pertussis	23	1.2	9.6e-07	1.4e-05
KEGG_PATHWAY	Fat digestion and absorption	16	0.8	1.2e-06	1.6e-05
KEGG_PATHWAY	Rheumatoid arthritis	24	1.3	4.9e-06	6.4e-05
KEGG_PATHWAY	Malaria	17	0.9	6.3e-06	7.8e-05
KEGG_PATHWAY	Prion diseases	13	0.7	3.8e-05	0.00045
KEGG_PATHWAY	Small cell lung cancer	21	1.1	0.0001	0.0011
KEGG_PATHWAY	Arachidonic acid metabolism	17	0.9	0.00013	0.0014
KEGG_PATHWAY	Ras signaling pathway	39	2.1	0.00033	0.0034
KEGG_PATHWAY	Mucin type O-Glycan biosynthesis	11	0.6	0.0004	0.0039
KEGG_PATHWAY	Other glycan degradation	8	0.4	0.00086	0.008
KEGG_PATHWAY	Toxoplasmosis	22	1.2	0.0014	0.013
KEGG_PATHWAY	alpha-Linolenic acid metabolism	9	0.5	0.0016	0.014
KEGG_PATHWAY	Antigen processing and presentation	17	0.9	0.0018	0.015
KEGG_PATHWAY	Arrhythmogenic right ventricular cardiomyopathy (ARVC)	15	0.8	0.0036	0.029
KEGG_PATHWAY	Legionellosis	13	0.7	0.0041	0.031
KEGG_PATHWAY	Renin-angiotensin system	8	0.4	0.0043	0.032
KEGG_PATHWAY	Linoleic acid metabolism	9	0.5	0.0045	0.033
KEGG_PATHWAY	Leishmaniasis	15	0.8	0.0063	0.044
KEGG_PATHWAY	Hematopoietic cell lineage	17	0.9	0.0073	0.049
KEGG_PATHWAY	Glycosphingolipid biosynthesis - globo series	6	0.3	0.0074	0.049
